# Supplementary material
Source: PubMed Central journal article supplement (PMC6541401)

**Supplemental Figure 1. Effect of spatial measurement error on the appearance of single particle trajectories. Related to Figure 3.**

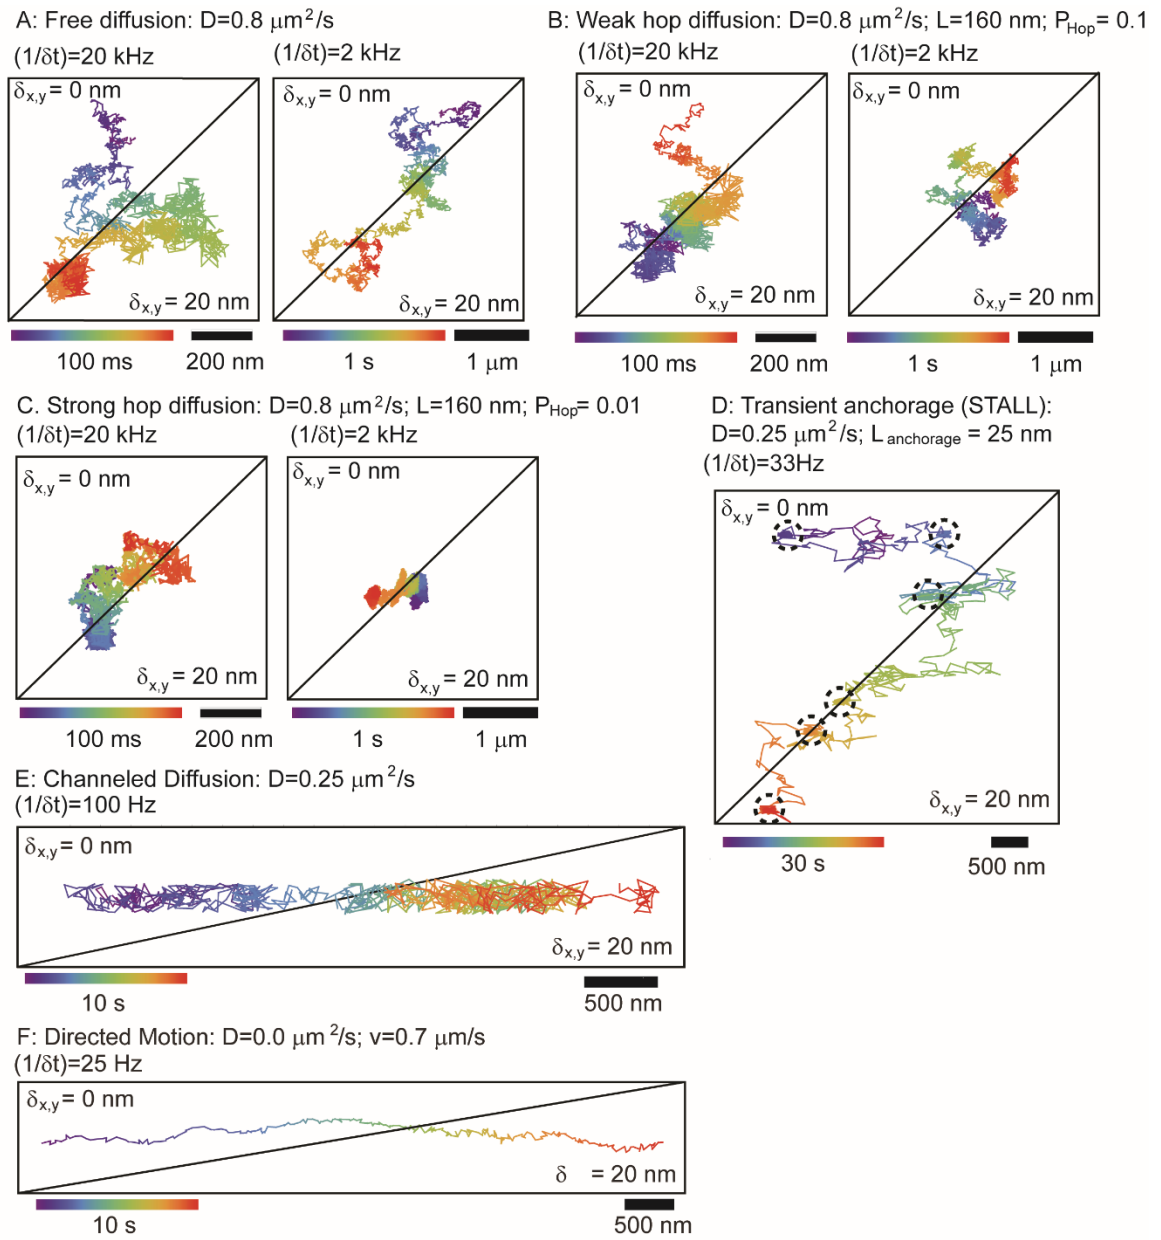

Supplement: NIHMS1527038-supplement-1.pdf [file NIHMS1527038-supplement-1.pdf]
