# Supplementary material
Source: PubMed Central journal article supplement (PMC6541401)

**Supplemental Figure 2. Effect of spatial measurement error on the appearance of MSD versus time and MSD/(4t) versus time plots. Related to Figure 2.**

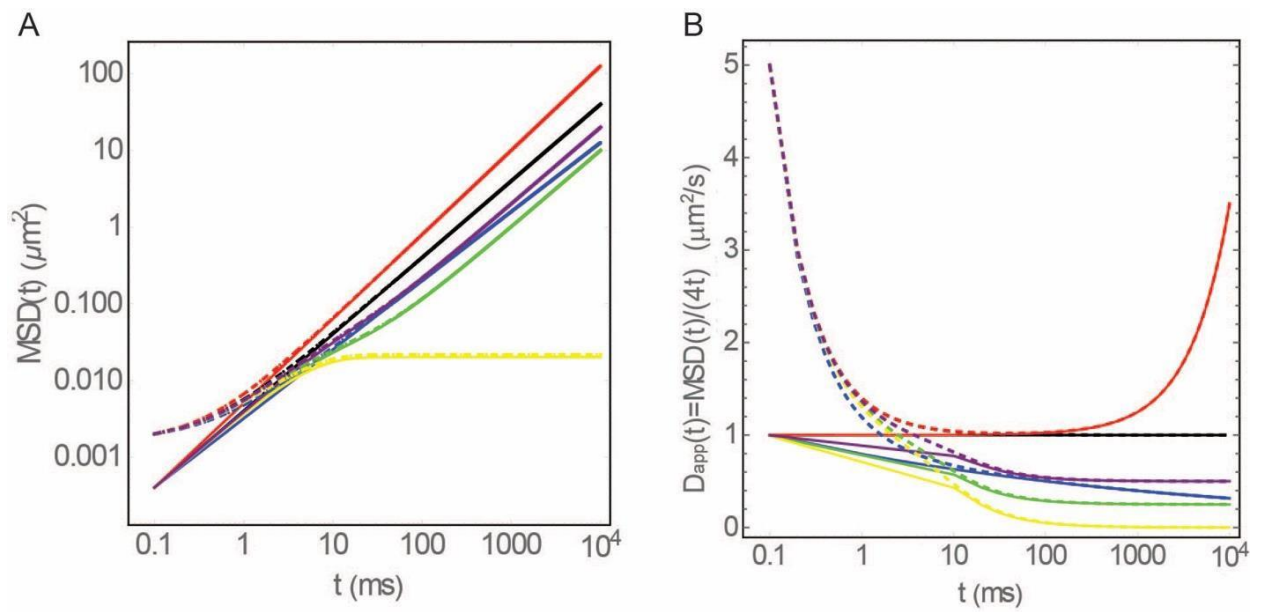

Supplement: NIHMS1527038-supplement-2.pdf [file NIHMS1527038-supplement-2.pdf]
