# Supplementary material
Source: PubMed Central journal article supplement (PMC6541401)
Supplement: NIHMS1527038-supplement-3.pdf [file NIHMS1527038-supplement-3.pdf]

**Supplemental Table 1. Mathematical expressions for a selection of diffusion models. Related to Figures 2 and 3.**

| Type of Diffusion                                | Diffusion Model <sup>a</sup>      | Mean squared displacement <sup>b</sup><br>$MSD_{theory}(nt_{lag})$                                            | Diffusion coefficient <sup>c</sup><br>$D(nt_{lag}) = \frac{MSD(nt_{lag})}{2d nt_{lag}}$              | $\lim_{nt_{lag} \rightarrow 0} D(nt_{lag})$                                         | $\lim_{nt_{lag} \rightarrow \tau} D(nt_{lag})$                                                                                   | $\lim_{nt_{lag} \rightarrow \infty} D(nt_{lag})$                                    |
|--------------------------------------------------|-----------------------------------|---------------------------------------------------------------------------------------------------------------|------------------------------------------------------------------------------------------------------|-------------------------------------------------------------------------------------|----------------------------------------------------------------------------------------------------------------------------------|-------------------------------------------------------------------------------------|
| Constant diffusion <sup>d</sup>                  | Free (Brownian)                   | $2d D nt_{lag}$                                                                                               | $D$                                                                                                  | $D$                                                                                 | $D$                                                                                                                              | $D$                                                                                 |
|                                                  | Free with directed motion         | $2d D nt_{lag} + v^2 (nt_{lag})^2$                                                                            | $D + \frac{v^2 nt_{lag}}{2d}$                                                                        | $D$                                                                                 | $D + \frac{v^2 \tau}{2d}$                                                                                                        | $D + \lim_{nt_{lag} \rightarrow \infty} \frac{v^2 nt_{lag}}{2d}$                    |
| Continuous time-dependent diffusion <sup>e</sup> | Anomalous <sup>g</sup>            | $2d D (nt_{lag})^\alpha$                                                                                      | $D (nt_{lag})^{\alpha-1}$                                                                            | $\begin{cases} \infty & \alpha < 1 \\ D & \alpha = 1 \\ 0 & \alpha > 1 \end{cases}$ | $\begin{cases} D \tau^{\alpha-1} & \text{if } \alpha \neq 1 \\ D & \text{if } \alpha = 1 \\ D & \text{if } \tau = 1 \end{cases}$ | $\begin{cases} 0 & \alpha < 1 \\ D & \alpha = 1 \\ \infty & \alpha > 1 \end{cases}$ |
|                                                  | Normalized Anomalous <sup>h</sup> | $2d D \tau \left(\frac{nt_{lag}}{\tau}\right)^\alpha$                                                         | $D \left(\frac{nt_{lag}}{\tau}\right)^{\alpha-1}$                                                    | $\begin{cases} \infty & \alpha < 1 \\ D & \alpha = 1 \\ 0 & \alpha > 1 \end{cases}$ | $D$                                                                                                                              | $\begin{cases} 0 & \alpha < 1 \\ D & \alpha = 1 \\ \infty & \alpha > 1 \end{cases}$ |
| Transient time-dependent diffusion <sup>f</sup>  | Confined <sup>i</sup>             | $2d D_\mu \tau \left(1 - e^{-\frac{n\Delta t}{\tau}}\right)$                                                  | $D_\mu \frac{\tau}{n\Delta t} \left(1 - e^{-\frac{n\Delta t}{\tau}}\right)$                          | $D_\mu$                                                                             | $D_\mu (1 - e^{-1})$                                                                                                             | $0$                                                                                 |
|                                                  | Hop <sup>j</sup>                  | $2d n\Delta t \left( D_M + D_\mu \frac{\tau}{n\Delta t} \left(1 - e^{-\frac{n\Delta t}{\tau}}\right) \right)$ | $D_M + D_\mu \frac{\tau}{n\Delta t} \left(1 - e^{-\frac{n\Delta t}{\tau}}\right)$                    | $D_M + D_\mu$                                                                       | $D_M + D_\mu (1 - e^{-1})$                                                                                                       | $D_M$                                                                               |
|                                                  | Channeled <sup>k</sup>            | $2D \tau \left(1 - e^{-\frac{n\Delta t}{\tau}}\right) + 2(d-1)D nt_{lag}$                                     | $\frac{D}{d} \frac{\tau}{nt_{lag}} \left(1 - e^{-\frac{n\Delta t}{\tau}}\right) + \frac{D}{d} (d-1)$ | $D$                                                                                 | $\frac{D}{d} (1 - e^{-1}) + \frac{D}{d} (d-1)$                                                                                   | $\frac{D}{d} (d-1)$                                                                 |

Footnotes:

<sup>a</sup> The following parameters are defined for all diffusion models as follows: MSD is the mean squared displacement,  $d$  is the dimensionality of the diffusion process, i.e.  $d=2$  for diffusion in a 2-dimensional plane,  $D$  is the diffusion coefficient,  $n$  is the number of experimental data points,  $t_{lag}$  is the lag time between consecutive data points,  $\tau$  is a specific time point  $n t_{lag}$ ,  $v$  is the directed flow velocity, and  $\alpha$  is an anomaly constant where  $\alpha < 1$  for sub-diffusion and  $\alpha > 1$  for super-diffusion. The remaining parameters are defined below.

<sup>b</sup> The typical main aim in investigations of lateral dynamics is to determine the time- dependence of the diffusion process and the magnitude of the diffusion coefficient,  $D$ . A standard approach for this is to perform a curve fitting of the time-dependence of the MSD ( $n t_{lag}$ ) to a suitable diffusion model. It has in this case further become customary to also include plots of the time dependence of the raw MSD ( $n t_{lag}$ ) data in order to directly be able to compare lateral dynamics data from different experimental conditions. However, this approach suffers from that it is not amendable for a direct, model-independent, assessment of the time-dependence of the diffusion process in terms of  $D$ , and furthermore that it is very difficult to directly assess the impact of experimental noise for data acquired at fast sampling frequencies (Supplemental Figure 1).

<sup>c</sup> An alternative method that is better suited for direct comparison of lateral dynamics data in terms of the time-dependence of  $D$  is to instead define a time dependent diffusion coefficient,  $D(n t_{lag})$ , as given in the table. This approach has the advantage that it is then possible to directly evaluate the time-dependence of the lateral dynamics data in terms of  $D$  in a model independent way, and furthermore to directly assess the impact of experimental noise in the measurements (Supplemental Figure 2).

<sup>d</sup> Constant diffusion processes are the only type of diffusion processes for which the magnitude of  $D$  can be directly compared between studies. This is because this is the only case where the magnitude of  $D$  is independent of the sampling time  $n t_{lag}$ .

<sup>e</sup> Continuous time-dependent diffusion processes have a time-dependent diffusion coefficient,  $D(n t_{lag})$ , that varies continuously with the sampling time  $n t_{lag}$ . Direct comparisons of the magnitude of the time-dependent diffusion coefficient,  $D(n t_{lag})$ , from different studies in this case is thus only possible at specific times,  $\tau = n t_{lag}$ .

<sup>f</sup> Transient time-dependent diffusion processes are defined by having a diffusion coefficient,  $D(n t_{lag})$ , that approaches constant, but separate, magnitudes in the limits of time  $n t_{lag} \rightarrow 0$  and  $n t_{lag} \rightarrow \infty$ , with some intermediate temporal transition zone. It is in this case possible to compare the magnitude of  $D$  but only then at the limiting values or at specific times,  $\tau = n t_{lag}$ .

<sup>g</sup> This conventional definition of the anomalous diffusion has the disadvantage that  $D$  has units that is also dependent on the magnitude of the anomaly constant  $\alpha$ . It is thus not possible to compare the magnitude of  $D$  unless the magnitude of the anomaly constant  $\alpha$  is also considered.

<sup>h</sup> This revised time normalized anomalous diffusion model has the advantage that the units of  $D$  are always in the traditional format of (distance)<sup>2</sup>/time for all values of the anomaly constant  $\alpha$  and the time constant  $\tau$ . This expression is furthermore directly amendable for calculating the magnitude of  $D$  independent of the anomaly constant  $\alpha$  for any specific value of the time  $\tau = n t_{lag}$ , and is thus also suitable for direct comparison of the magnitude of  $D$  at specific times.

<sup>i</sup> This expression is for completely confined diffusion in a confinement area that is given by  $L^2 = 12 D_{\mu} \tau$  where  $L$  is the linear confinement dimension,  $D_{\mu}$  is the unhindered diffusion coefficient within the confinement area and  $\tau$  is a time constant at which the magnitude of  $D_{\mu}$  has been reduced by a factor of  $1/e$ .

<sup>j</sup> This expression is for transiently confined diffusion, or so called hop-diffusion, where the time-dependent diffusion coefficient,  $D(n t_{lag})$ , consists of a long-range, intracompartamental, time-independent, diffusion coefficient component,  $D_M$ , and a short-range, intercompartmental, time-dependent diffusion coefficient component,  $D_{\mu}$ . The confinement area is given, as above, by  $L^2 = 12 D_{\mu} \tau$  where  $\tau$  is a time constant at which the magnitude of  $D_{\mu}$  has been reduced by a factor of  $1/e$ .

<sup>k</sup> This expression is for channeled diffusion, where a molecule is confined along one spatial dimension, but diffuses freely along the other spatial dimensions. The channel width is given by  $L = (12 D \tau)^{1/2}$  where  $\tau$  is a time constant at which the magnitude of  $D$ , in a direction that is perpendicular to the channel has been reduced by a factor of  $1/e$
